# Supplementary material
Source: MDPI journal article supplement (https://www.mdpi.com/2073-4344/11/7/854)
Supplement: s1 [file s1 › catalysts-1302909-supplementary.pdf]

# **Perovskite Zinc Titanate Photocatalysts Synthesized by Sol-gel Method and Its Application on Photocatalytic Degradation of Emerging Contaminants**

Wei-Yu Chen<sup>1</sup>, Ching-Ping Wang<sup>2</sup>, Po-Chou Chen<sup>2</sup>, Kun-Yi Andrew Lin<sup>3</sup>, Surajit Ghosh<sup>4</sup>, Chao-Wei Huang<sup>\*2,5</sup>, Van-Huy Nguyen<sup>¶ 6</sup>

<sup>1</sup> Department of Chemical and Materials Engineering, Southern Taiwan University of Science and Technology, Tainan 71005, Taiwan

<sup>2</sup> Department of Chemical and Materials Engineering, National Kaohsiung University of Science and Technology, Kaohsiung 80778, Taiwan

<sup>3</sup> Department of Environmental Engineering, i-Center for Advanced Science and Technology (iCAST), Innovation and Development Center of Sustainable Agriculture, National Chung Hsing University, Taichung 402227, Taiwan

<sup>4</sup> Department of Chemical Engineering, Malaviya National Institute of Technology, Jaipur, India

<sup>5</sup> Photo-SMART (Photo-Sensitive Material Advanced Research and Technology) Center, National Kaohsiung University of Science and Technology, Kaohsiung 80778, Taiwan

<sup>6</sup> Biotechnology, Binh Duong University, Thu Dau Mot, Vietnam.

## **Corresponding authors**

\* Chao-Wei Huang (huangcw@nkust.edu.tw) Tel.: +886-7-3814526 Ext: 15126

¶ Van-Huy Nguyen (nguyenvanhuy@tdtu.edu.vn)

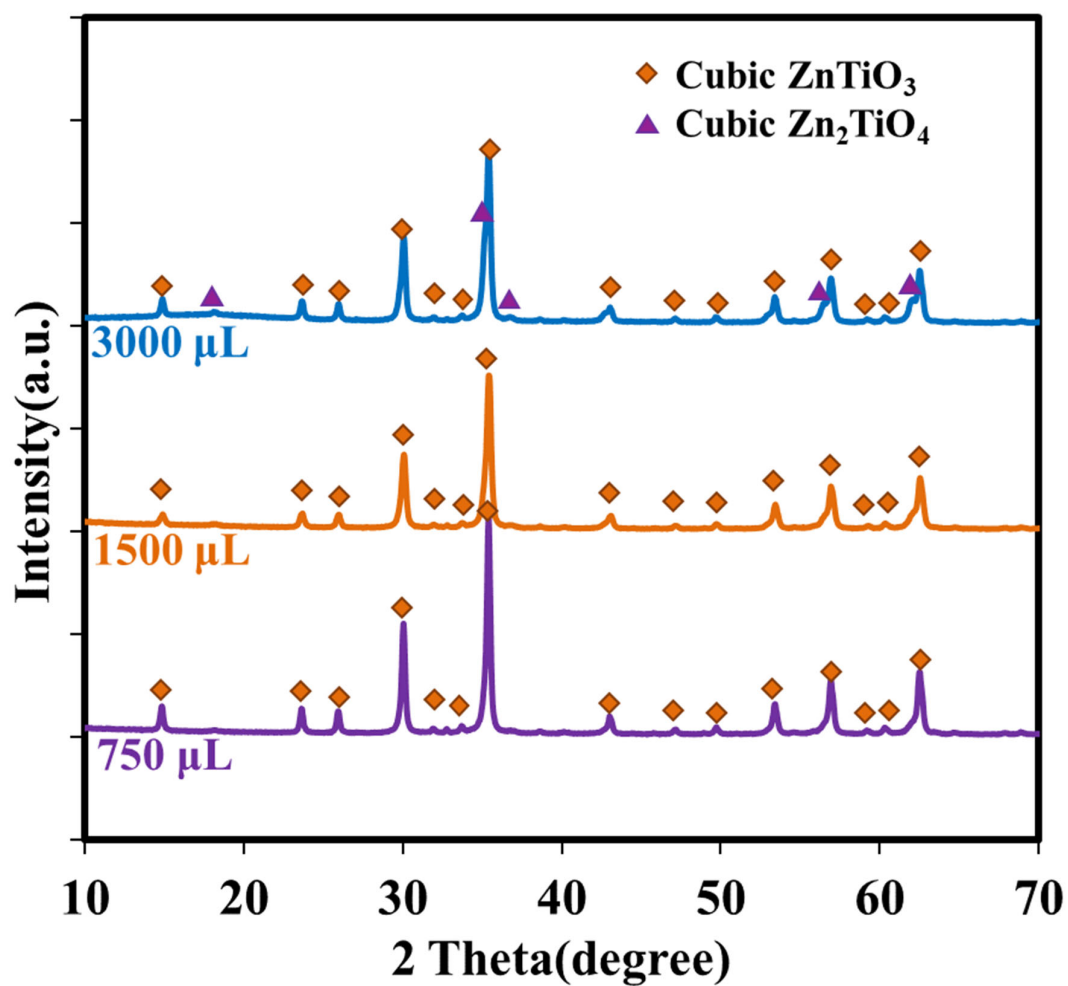

Figure S1. XRD patterns of ZnTiO<sub>3</sub> photocatalysts (synthesized by adding 5 g PVP) under the calcination temperature of 700 °C with various amounts of NH<sub>4</sub>OH addition (750, 1500, and 3000 μL).

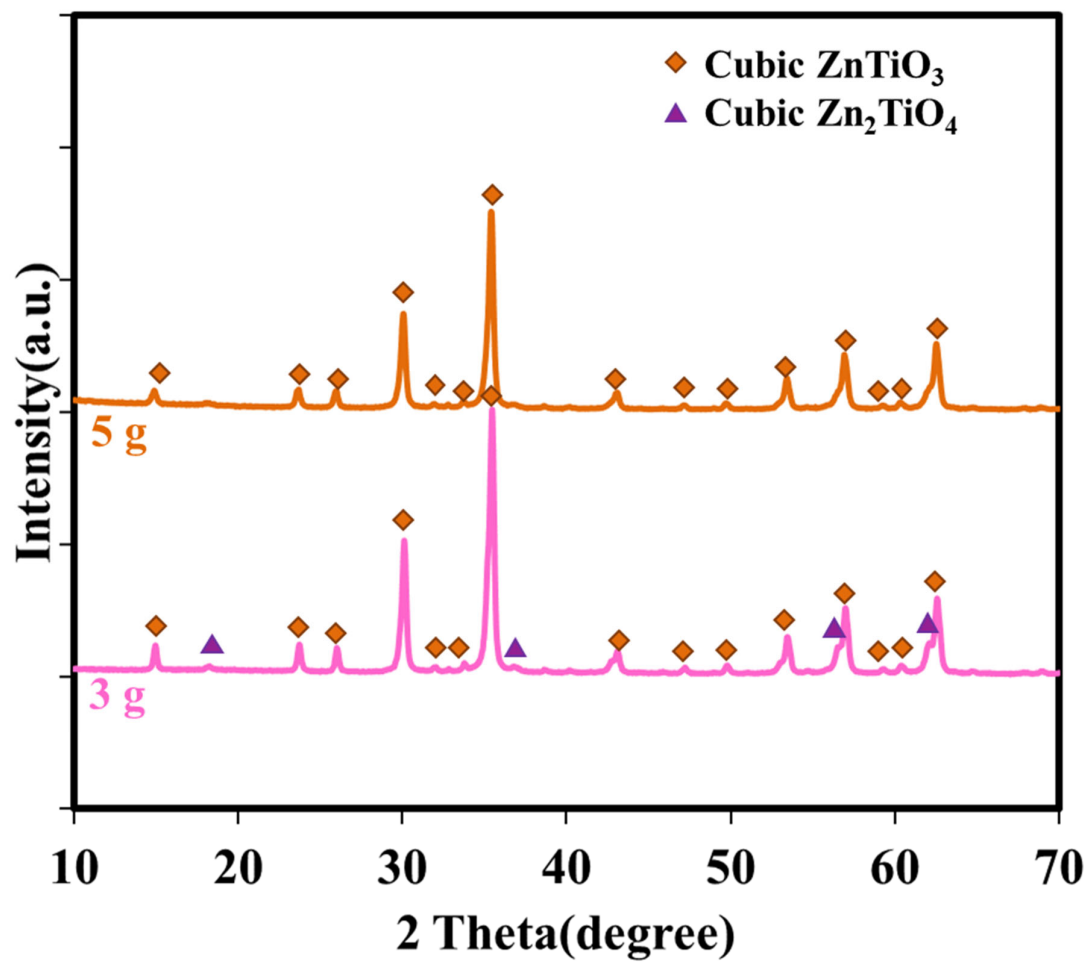

Figure S2. The XRD patterns of ZnTiO<sub>3</sub> photocatalysts prepared by adding 3g and 5 g PVP under the calcination temperature of 700 °C with NH<sub>4</sub>OH addition of 1500 μL.

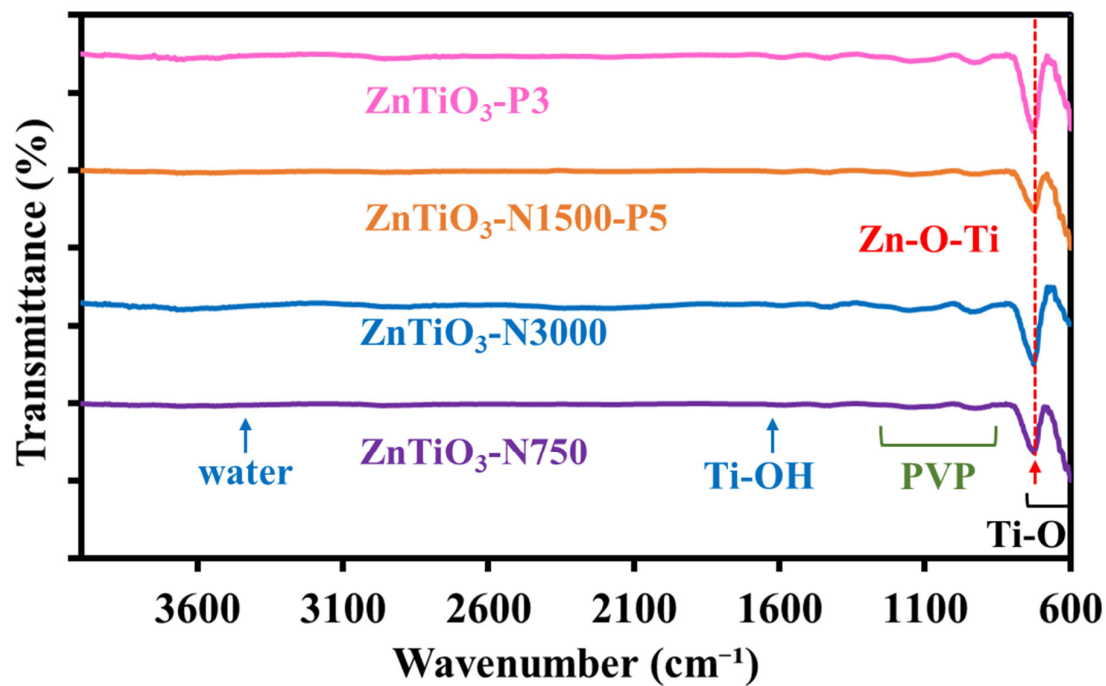

Figure S3. FTIR spectra of various  $\text{ZnTiO}_3$  prepared by various conditions

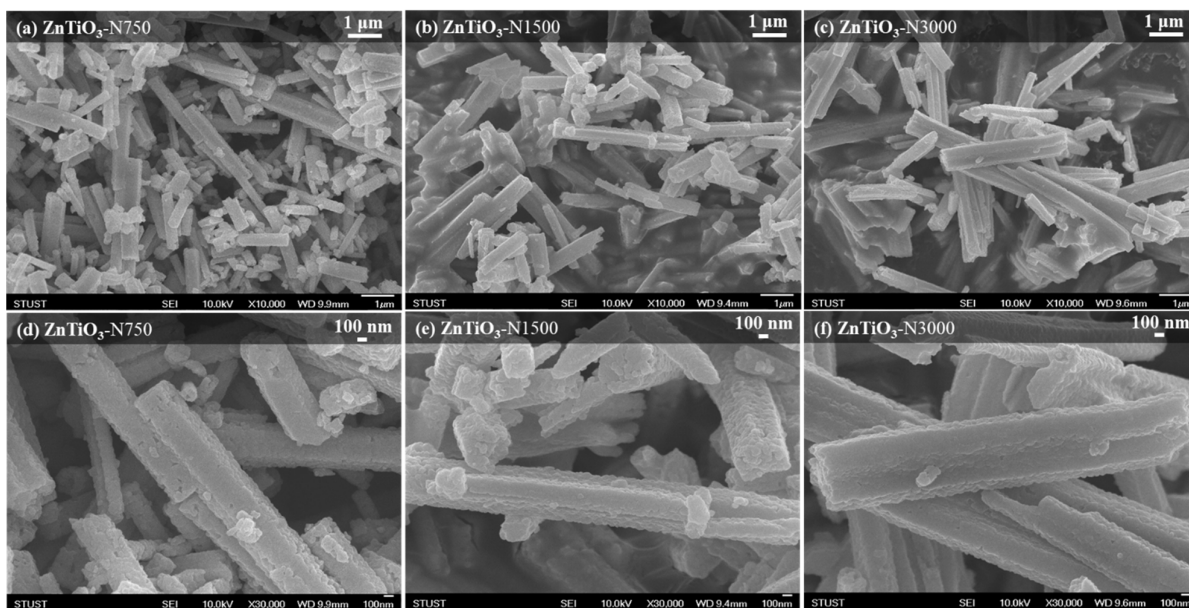

Figure S4. (a)-(d) and (d)-(f) the SEM images at the magnification of 10,000 $\times$  and 30,000 $\times$  of  $\text{ZnTiO}_3$ -N750,  $\text{ZnTiO}_3$ -N1500, and  $\text{ZnTiO}_3$ -3000

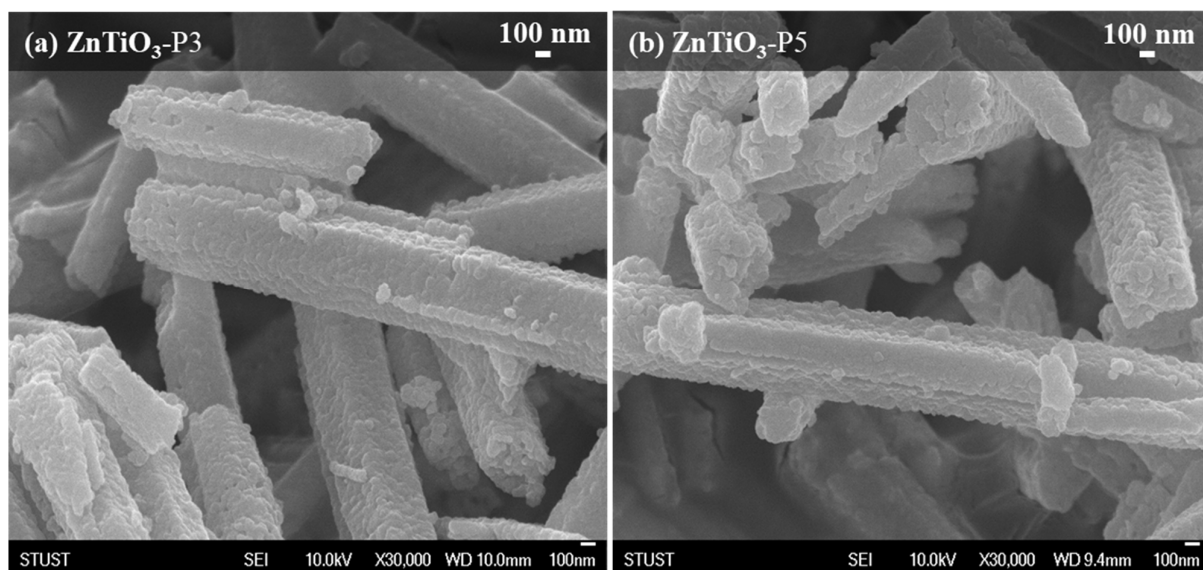

Figure S5. the SEM images at the magnification of 30,000 $\times$  of (a) ZnTiO<sub>3</sub>-P3 and (b) ZnTiO<sub>3</sub>-P5.

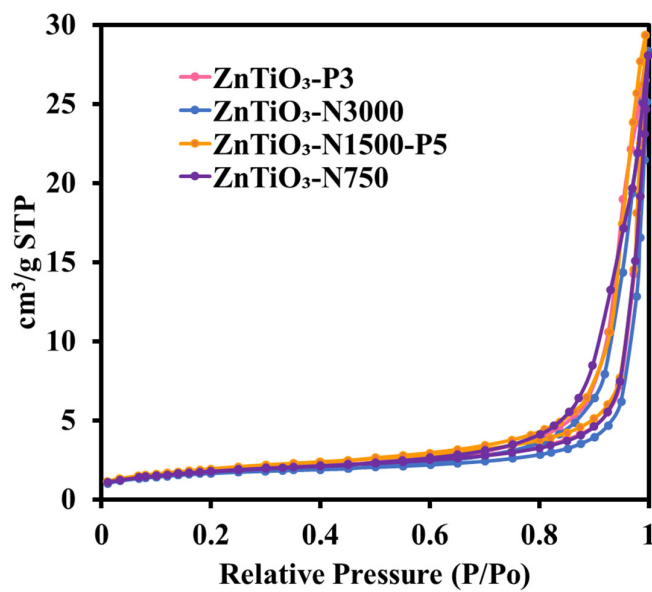

Figure S6. N<sub>2</sub> adsorption-desorption isotherms of ZnTiO<sub>3</sub> prepared various NH<sub>4</sub>OH and PVP modification.

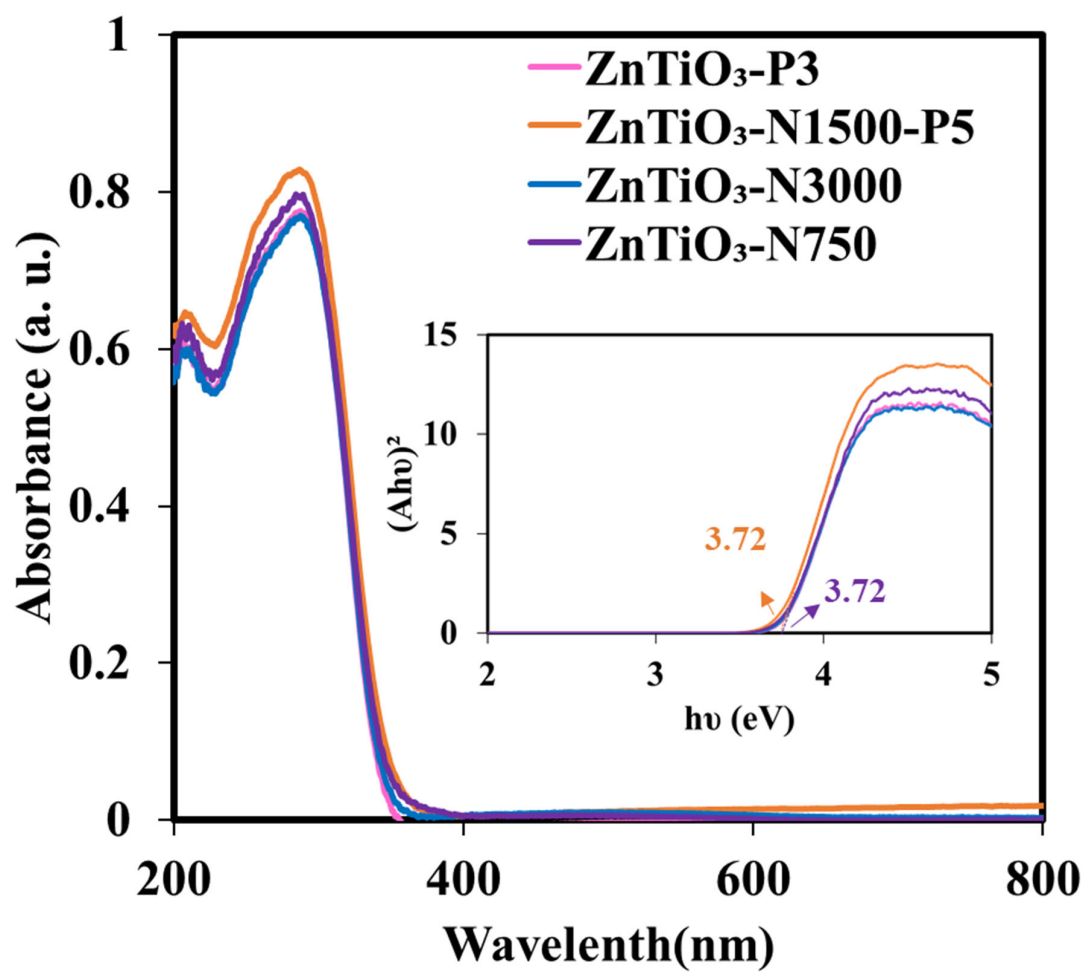

Figure S7. UV-Vis result of ZnTiO<sub>3</sub> prepared by various amounts of NH<sub>4</sub>OH and PVP modification.

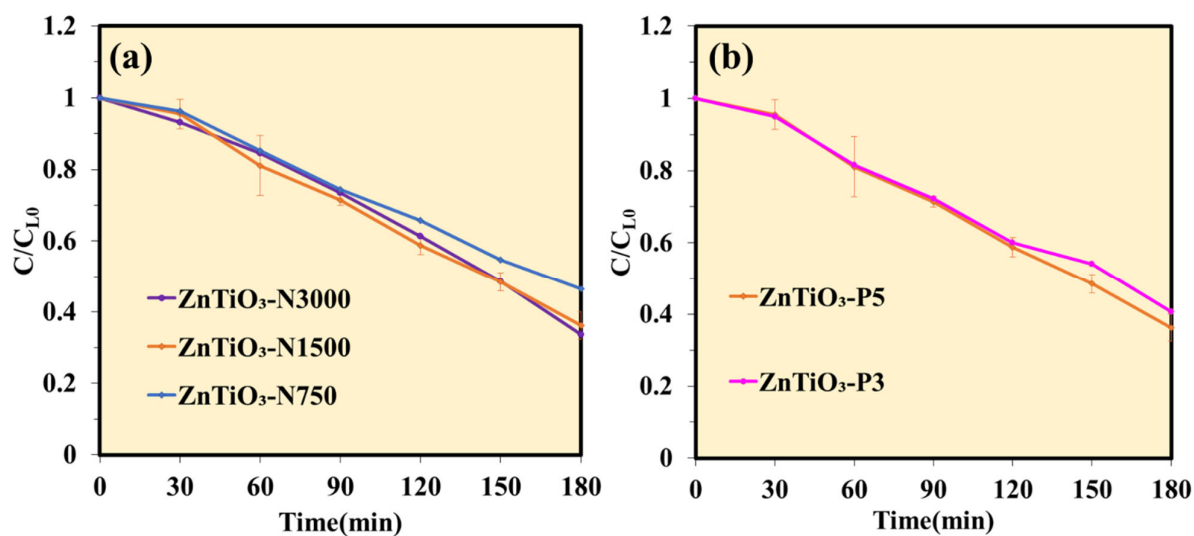

Figure S8. The changes of  $C/C_{L0}$  with reaction time (a) for various amounts of  $NH_4OH$  addition and (b) for various amounts of PVP addition.

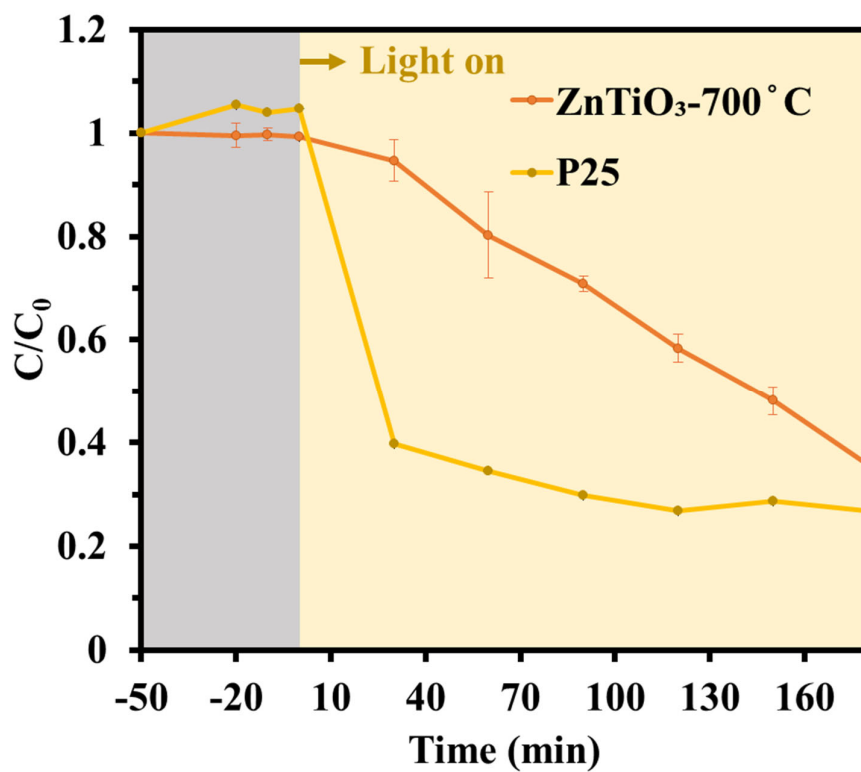

Figure S9. The changes of  $C/C_0$  with reaction time by using P25 and  $ZnTiO_3-700^\circ C$ .

Table S1. the comparison of activities over different photocatalysts to degrade AMX.

| Photocatalysts                                                       | Light                                                                                                                            | Dosage                                          | AMX conc.     | Results                                                                                                                                 | Ref. (Year) |
|----------------------------------------------------------------------|----------------------------------------------------------------------------------------------------------------------------------|-------------------------------------------------|---------------|-----------------------------------------------------------------------------------------------------------------------------------------|-------------|
| FeSO <sub>4</sub> ·7H <sub>2</sub> O + H <sub>2</sub> O <sub>2</sub> | 672 W/m <sup>2</sup> UV light                                                                                                    | FeSO <sub>4</sub> ·7H <sub>2</sub> O (30 mg/L)/ | 10 mg/L       | (1) H <sub>2</sub> O <sub>2</sub> (375 mg/L) was necessary.<br>(2) fully degrade AMX in 12 min irradiation via photo-Fenton             | [1] (2019)  |
| Magnetic fluorinated mesoporous g-C <sub>3</sub> N <sub>4</sub>      | UV light: low-pressure lamp for (maximum emission 250nm);<br>Visible light: 500 W halogen lamp with a UV cutoff filter (>400 nm) | 1 g/L                                           | 91.4 mg/L     | (1) UVC lamp: AMX was degraded by 75%~90% in 120 min irradiation.<br>(2) Visible light: AMX was degraded by 30% in 120 min irradiation. | [2] (2019)  |
| graphite carbon nitride (g-C <sub>3</sub> N <sub>4</sub> )           | 300 W xenon lamp (with filter > 420 nm)                                                                                          | 0.1 g/L                                         | 1, 5, 10 mg/L | AMX was degraded by 99%, 69%, 40% for AMX solution of 1, 5,                                                                             | [3] (2019)  |

|                                                                                                                                  |                                                                                                  |         |         |                                                                                                                                                                                                                                                  |               |
|----------------------------------------------------------------------------------------------------------------------------------|--------------------------------------------------------------------------------------------------|---------|---------|--------------------------------------------------------------------------------------------------------------------------------------------------------------------------------------------------------------------------------------------------|---------------|
|                                                                                                                                  |                                                                                                  |         |         | 10 mg/L,<br>respectively, in<br>60 min<br>irradiation.                                                                                                                                                                                           |               |
| Ba<br>(Ti <sub>0.950</sub> Sc <sub>0.025</sub> Nb <sub>0.025</sub> )O <sub>3</sub>                                               | average solar<br>flux of<br>~1030 mW/<br>cm <sup>2</sup>                                         | 0.5 g/L | 50 mg/L | AMX was<br>degraded by<br>52.8% in 210<br>min irradiation.                                                                                                                                                                                       | [4]<br>(2018) |
| (1) GrO<br>(2) GrO + MIL-<br>68(In)-NH <sub>2</sub><br>(3) MIL-68(In)-NH <sub>2</sub><br>(4) MIL-68(In)-NH <sub>2</sub> /<br>GrO | 300 W Xe<br>lamp (with<br>filter > 420 nm)                                                       | 0.6 g/L | 20 mg/L | (1) GrO: 20%<br>(2) GrO+<br>MIL-<br>68(In)-<br>NH <sub>2</sub> : 40%<br>(3) MIL-<br>68(In)-<br>NH <sub>2</sub> : 60%<br>(4) MIL-<br>68(In)-<br>NH <sub>2</sub> /GrO:<br>90%<br><br>The degradation<br>was achieved in<br>210 min<br>irradiation. | [5]<br>(2017) |
| hetero-junction p-<br>CuO/n-ZnO                                                                                                  | (1) sunlight<br>irradiation<br>(109<br>mW/cm <sup>2</sup> )<br><br>(2) 200 W<br>tungsten<br>lamp | 0.5 g/L | 50 mg/L | (1) sunlight<br>irradiation<br>(109<br>mW/cm <sup>2</sup> ):<br>90%<br>(2) 200 W<br>tungsten<br>lamp: 70%                                                                                                                                        | [6]<br>(2016) |

|                                                                                                                                                             |                                                              |              |                |                                                                                                                                                                                                         |                   |
|-------------------------------------------------------------------------------------------------------------------------------------------------------------|--------------------------------------------------------------|--------------|----------------|---------------------------------------------------------------------------------------------------------------------------------------------------------------------------------------------------------|-------------------|
|                                                                                                                                                             |                                                              |              |                | Above-mentioned degradation was achieved in 240 min irradiation.                                                                                                                                        |                   |
| <p>TiO<sub>2</sub>/zeolite</p> <p>(1) acid treated &amp; 300 °C</p> <p>(2) acid-alkali treated &amp; 300 °C</p> <p>(3) acid-alkali treated &amp; 450 °C</p> | <p>47W Hg-lamp (cut-off wavelength ≤290 nm)</p>              | <p>2 g/L</p> | <p>30 mg/L</p> | <p>(1) acid treated &amp; 300 °C: 61%</p> <p>(2) acid-alkali treated &amp; 300 °C: 88%</p> <p>(3) acid-alkali treated &amp; 450 °C: 72%</p> <p>The degradation was achieved in 240 min irradiation.</p> | <p>[7] (2015)</p> |
| <p>(SPR)-Ag/TiO<sub>2</sub></p>                                                                                                                             | <p>500 W tungsten-halogen lamps with high-pass UV filter</p> | <p>1 g/L</p> | <p>20 mg/L</p> | <p>0wt%, 0.5wt%, 1wt%, 3wt%, 5wt% Ag/TiO<sub>2</sub> degraded AMX by 27.9%, 28.7%, 57.7%, 63.5%, 61.1% in 300 min irradiation.</p>                                                                      | <p>[8] (2014)</p> |

|                           |                                                     |         |                |                                                                                                                           |                |
|---------------------------|-----------------------------------------------------|---------|----------------|---------------------------------------------------------------------------------------------------------------------------|----------------|
| TiO <sub>2</sub> (P25)    | 9 W UV-A<br>(predominantly<br>at 350–400<br>nm)     | 0.5 g/L | 2.5–30<br>mg/L | AMX was fully<br>degraded in 45<br>min                                                                                    | [9]<br>(2012)  |
| ZnO                       | 6 W UV lamp<br>(emitting<br>radiation at<br>365 nm) | 0.5 g/L | 104<br>mg/L    | (1) pH=5: 59%<br>(2) pH=8: 72%<br>(3) pH=11,<br>100%<br><br>The degradation<br>was achieved in<br>120 min<br>irradiation. | [10]<br>(2010) |
| ZnTiO <sub>3</sub> -700°C | UV LEDs (8W<br>×4, within<br>280~320 nm)            | 0.5 g/L | 10 mg/L        | AMX was<br>degraded by<br>63.8% in 180<br>min irradiation                                                                 | This<br>study  |

## Reference

1. Verma, M.; Haritash, A.K. Degradation of amoxicillin by fenton and fenton-integrated hybrid oxidation processes. *Journal of Environmental Chemical Engineering* **2019**, *7*, 102886.
2. Mirzaei, A.; Chen, Z.; Haghighat, F.; Yerushalmi, L. Magnetic fluorinated mesoporous g-c<sub>3</sub>n<sub>4</sub> for photocatalytic degradation of amoxicillin: Transformation mechanism and toxicity assessment. *Applied Catalysis B: Environmental* **2019**, *242*, 337-348.
3. Dou, M.; Wang, J.; Gao, B.; Xu, C.; Yang, F. Photocatalytic difference of amoxicillin and cefotaxime under visible light by mesoporous g-c<sub>3</sub>n<sub>4</sub>: Mechanism, degradation pathway and dft calculation. *Chemical Engineering Journal* **2019**, 123134.
4. Haddadou, N.; Bensemma, N.; Rekhila, G.; Trari, M.; Taïbi, K. Photoelectrochemical investigations in lead-free ba (ti<sub>0.950</sub>sc<sub>0.025</sub>nb<sub>0.025</sub>)o<sub>3</sub> ferroelectric ceramics. Application to amoxicillin photodegradation. *Journal of Photochemistry and Photobiology A: Chemistry* **2018**, *358*, 294-299.
5. Yang, C.; You, X.; Cheng, J.; Zheng, H.; Chen, Y. A novel visible-light-driven in-based mof/graphene oxide composite photocatalyst with enhanced photocatalytic activity toward the degradation of amoxicillin. *Applied Catalysis B: Environmental* **2017**, *200*, 673-680.
6. Belaissa, Y.; Nibou, D.; Assadi, A.A.; Bellal, B.; Trari, M. A new hetero-junction p-cuo/n-zno for the removal of amoxicillin by photocatalysis under solar irradiation. *Journal of the Taiwan Institute of Chemical Engineers* **2016**, *68*, 254-265.
7. Kanakaraju, D.; Kockler, J.; Motti, C.A.; Glass, B.D.; Oelgemöller, M. Titanium dioxide/zeolite integrated photocatalytic adsorbents for the degradation of amoxicillin. *Applied Catalysis B: Environmental* **2015**, *166-167*, 45-55.
8. Leong, K.H.; Gan, B.L.; Ibrahim, S.; Saravanan, P. Synthesis of surface plasmon resonance (spr) triggered ag/tio<sub>2</sub> photocatalyst for degradation of endocrine disturbing compounds. *Applied Surface Science* **2014**, *319*, 128-135.
9. Dimitrakopoulou, D.; Rethemiotaki, I.; Frontistis, Z.; Xekoukoulotakis, N.P.; Venieri, D.; Mantzavinos, D. Degradation, mineralization and antibiotic inactivation of amoxicillin by uv-a/tio<sub>2</sub> photocatalysis. *Journal of Environmental Management* **2012**, *98*, 168-174.
10. Elmolla, E.S.; Chaudhuri, M. Degradation of amoxicillin, ampicillin and cloxacillin antibiotics in aqueous solution by the uv/zno photocatalytic process. *Journal of Hazardous Materials* **2010**, *173*, 445-449.
